# Supplementary material for: Evaluating the Efficiency of gRNAs in CRISPR/Cas9 Mediated Genome Editing in Poplars
Source: MDPI journal article supplement (doi:10.3390/ijms20153623), 2019-07-24

## Online Resource 1

### gRNA sequences and structures

The given sequences are colored in the following scheme: gRNA sequence green, hairpin sequence blue, tracrRNA grey.

gRNA1 sequence (targeting *SOC1*)

UUGGACAGCC ACAGAU<sup>gRNA</sup>CGC GUUUUAGAGC UAGAAAUAGC AAGUUAAAAU AAGGCUAGUC  
CGUUAUCAAC UUGAAAAAGU GGCACCGAGU CGGUGCUUUU UUU

gRNA2 sequence (targeting *SOC1* Paralog 1 and Paralog 2)

GUAAAU<sup>gRNA</sup>GCAU CUUCCU<sup>gRNA</sup>CAC GUUUUAGAGC UAGAAAUAGC AAGUUAAAAU AAGGCUAGUC  
CGUUAUCAAC UUGAAAAAGU GGCACCGAGU CGGUGCUUUU UUU

gRNA3 sequence (targeting *AGL8.1*)

UUCCCGAAUG AGUUCAAGG GUUUUAGAGC UAGAAAUAGC AAGUUAAAAU AAGGCUAGUC  
CGUUAUCAAC UUGAAAAAGU GGCACCGAGU CGGUGCUUUU UUU

gRNA4 sequence (targeting *AGL8.2*)

UGCCCGAAUG UGUUUAAGG GUUUUAGAGC UAGAAAUAGC AAGUUAAAAU AAGGCUAGUC  
CGUUAUCAAC UUGAAAAAGU GGCACCGAGU CGGUGCUUUU UUU

gRNA5 sequence (targeting *NFP-like1*)

AGUUGAUUUG GAAAUAAUG GUUUUAGAGC AGAAAUAGCA AGUUAAAAU AAGGCUAGUC  
GUUAUCAACU UGAAAAAGU GCACCGAGUC GGUGCUUUUU UU

gRNA6 sequence (targeting *NFP-like1*)

UUCUUCUCGA UUCCACAUU GUUUUAGAGC UAGAAAUAGC AAGUUAAAAU AAGGCUAGUC  
CGUUAUCAAC UUGAAAAAGU GGCACCGAGU CGGUGCUUUU UUU

gRNA7 sequence (targeting *NFP-like3* and *NFP-like4*)

CGAGAAAAGG UCACCGAUUG GUUUUAGAGC UAGAAAUAGC AAGUUAAAAU AAGGCUAGUC  
CGUUAUCAAC UUGAAAAAGU GGCACCGAGU CGGUGCUUUU UUU

gRNA8 sequence (targeting *NFP-like3* and *NFP-like4*)

UACUUGGUUU UGAUAUCAU GUUUUAGAGC UAGAAAUAGC AAGUUAAAAU AAGGCUAGUC  
CGUUAUCAAC UUGAAAAAGU GGCACCGAGU CGGUGCUUUU UUU

gRNA9 sequence (targeting *TOZ19*)

UCCAGAAGCA UGGCAAGCCA GUUUUAGAGC UAGAAAUAGC AAGUUAAAAU AAGGCUAGUC  
CGUUAUCAAC UUGAAAAAGU GGCACCGAGU CGGUGCUUUU UUU

# Evaluating the Efficiency of gRNAs in CRISPR/Cas9 Mediated Genome Editing in Poplars

T. Bruegmann\*, K. Deecke, M. Fladung\*

Thuenen Institute of Forest Genetics, Grosshansdorf, Germany

tobias.bruegmann@thuenen.de; matthias.fladung@thuenen.de

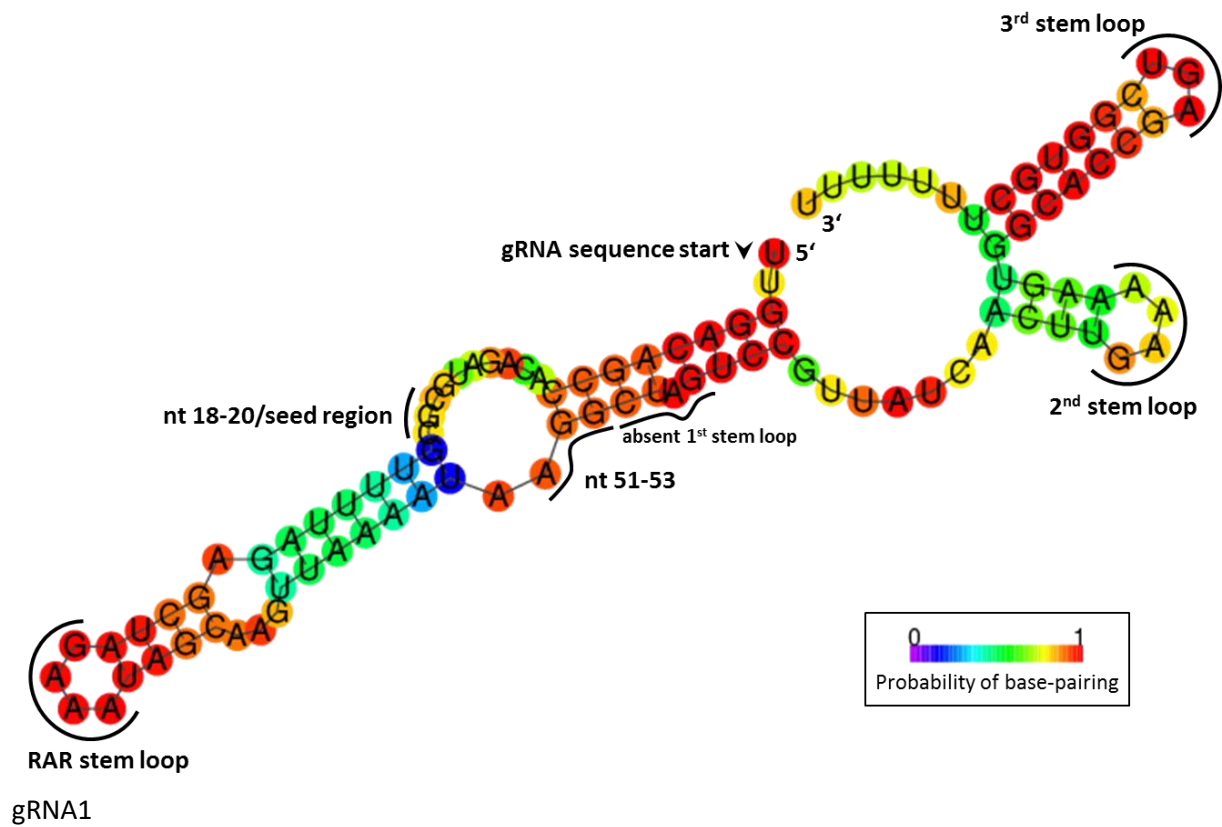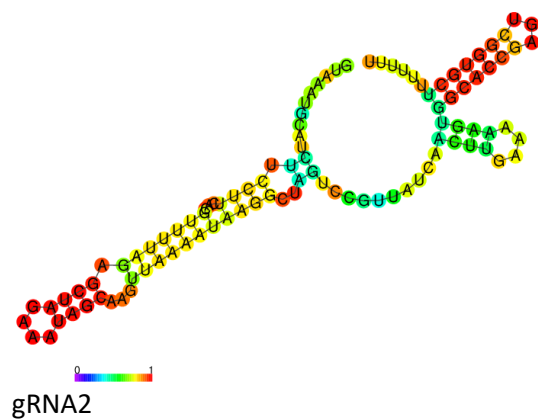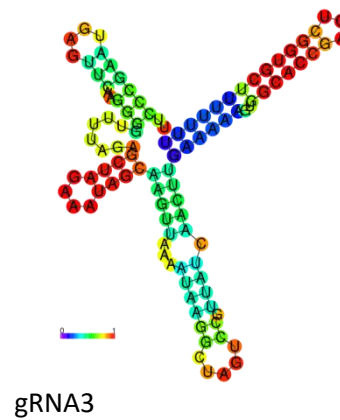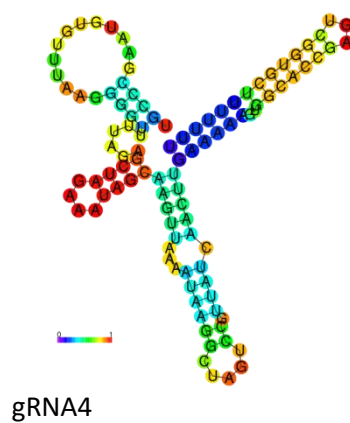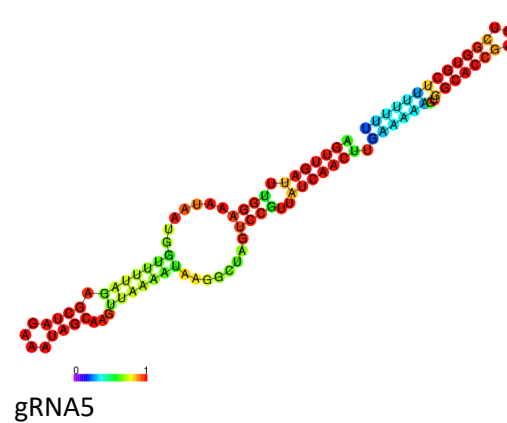

# Evaluating the Efficiency of gRNAs in CRISPR/Cas9 Mediated Genome Editing in Poplars

T. Bruegmann\*, K. Deecke, M. Fladung\*

Thuenen Institute of Forest Genetics, Grosshansdorf, Germany

tobias.bruegmann@thuenen.de; matthias.fladung@thuenen.de

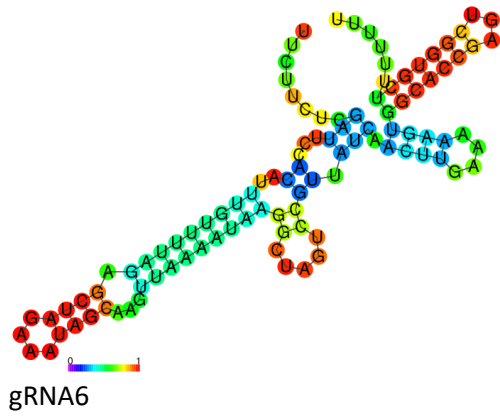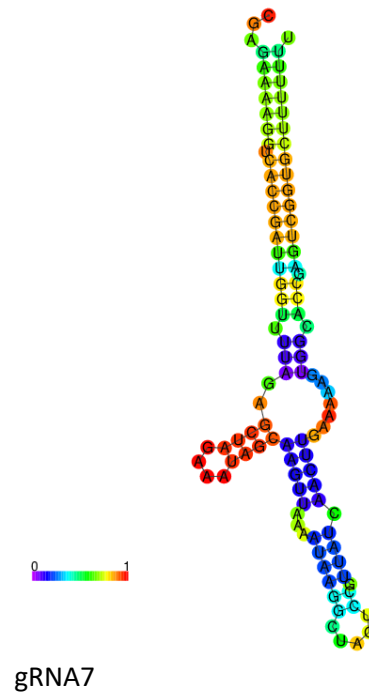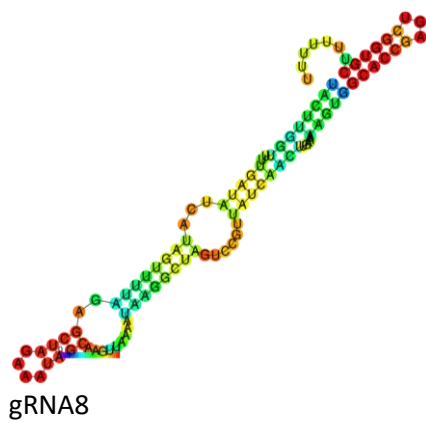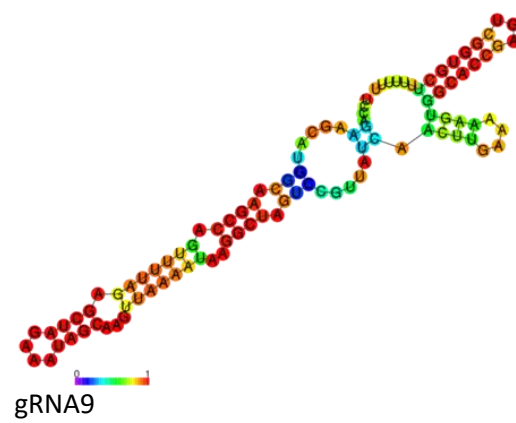

Supplement: s1 [file s1]
