# Supplementary material for: Evaluating the Efficiency of gRNAs in CRISPR/Cas9 Mediated Genome Editing in Poplars
Source: MDPI journal article supplement (doi:10.3390/ijms20153623), 2019-07-24
Supplement: s1 [file s1]

## Online Resource 2

### Sequencing results of *NFP-like1* at first time point

Modification in *NFP-like1* gRNA5 at first time point. Highlighted in yellow: PAM-recognition motif.

Letter in red represent insertions according to wildtype. Gaps in red highlighted represent deletions according to wildtype. Sequences illustrate both alleles.

| Plant line | Sequencing results                                                                                                    | Commentary                                           |
|------------|-----------------------------------------------------------------------------------------------------------------------|------------------------------------------------------|
| Wildtype   | . . . GGAAATA-ATG <b>GGG</b> . . .<br>. . . GGAAATA-ATG <b>GGG</b> . . .                                              |                                                      |
| N 481-2    | . . . GGAAATA- - TG <b>GGG</b> . . .<br>. . . GGAAATA- - TG <b>GGG</b> . . .                                          | Homozygous deletion of A                             |
| N 481-9    | . . . GGAA- - - - - <b>GGG</b> . . .<br>. . . GGAAATA- - TG <b>GGG</b> . . .                                          | Biallelic mutation: deletion ATAAT and deletion A    |
| N 481-15   | . . . GGAAATA- - TG <b>GGG</b> . . .<br>. . . GGAAATA <b>A</b> ATG <b>GGG</b> . . .                                   | Biallelic mutation: deletion A, insertion A          |
| N 481-23   | . . . GGAAA- - - ATG <b>GGG</b> . . .<br>. . . GGAAATA- - TG <b>GGG</b> . . .<br>. . . GGAAA- - - TG <b>GGG</b> . . . | Chimera: deletion TA, deletion A, deletion TAA       |
| N 481-33   | . . . GGAAATA <b>A</b> ATG <b>GGG</b> . . .<br>. . . GGAAATA- - TG <b>GGG</b> . . .                                   | Biallelic mutation: insertion A, deletion A          |
| N 481-97   | . . . GGAATA( <b>36nt</b> )ATG <b>GGG</b> . . .<br>. . . GGAATA( <b>42nt</b> )ATG <b>GGG</b> . . .                    | Biallelic mutation: insertion 36 nt, insertion 42 nt |
