# Supplementary material for: Evaluating the Efficiency of gRNAs in CRISPR/Cas9 Mediated Genome Editing in Poplars
Source: MDPI journal article supplement (doi:10.3390/ijms20153623), 2019-07-24
Supplement: s1 [file s1]

## Online Resource 3

### Transformation vectors

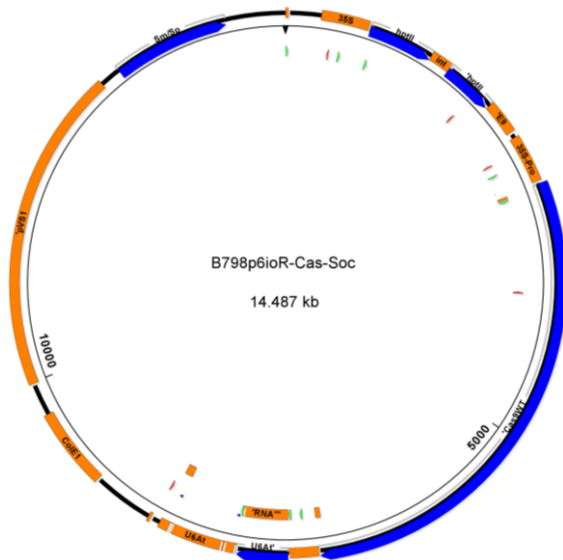

**Fig. 1** B798p6ioR-Cas-Soc plasmid encoding gRNAs for the knockout of *SOC1* and two *SOC1* paralogous genes

35S: cauliflower mosaic virus 35S promoter; int: StLS1 (*Solanum tuberosum* rbcL-large subunit 1)-intron; hptII: coding sequence of hygromycin resistance gene; 'E9: terminator Rbcs-E9; 35S-Pro: cauliflower mosaic virus 35S promoter region; 'Cas9WT: Cas9 coding sequence of Cas9 wildtype gene (*Streptococcus pyogenes*); U6at: coding U6 promoter (*Arabidopsis thaliana*) followed by gRNA sequence; ColE1: origin of replication; 'pVS1: origin of replication in *A. tumefaciens*; Sm/Sp: coding sequence of streptomycin/spectinomycin resistance gene

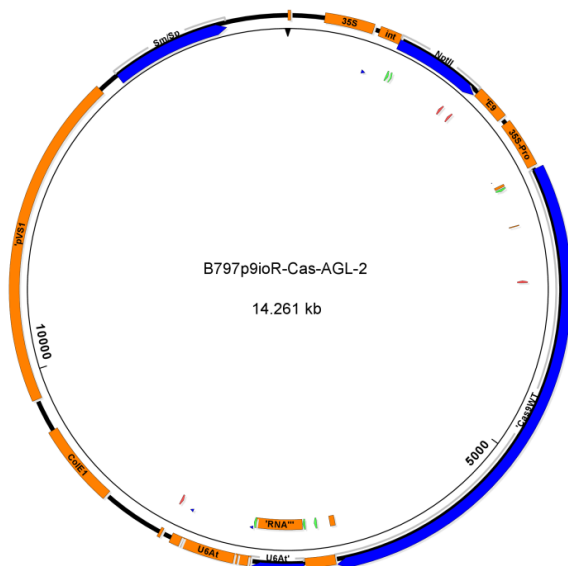

**Fig. 2** B797p9ioR-Cas-AGL-2 plasmid encoding gRNAs for the knockout of *AGL8.1* and *AGL8.2*

35S: cauliflower mosaic virus 35S promoter; int: StLS1 (*Solanum tuberosum* rbcL-large subunit 1)-intron; NptII: coding sequence of kanamycin resistance gene; 'E9: terminator Rbcs-E9; 35S-Pro: cauliflower mosaic virus 35S promoter region; 'Cas9WT: Cas9 coding sequence of Cas9 wildtype gene (*Streptococcus pyogenes*); U6at: coding U6 promoter (*Arabidopsis thaliana*) followed by gRNA sequence; ColE1: origin of replication; 'pVS1: origin of replication in *A. tumefaciens*; Sm/Sp: coding sequence of streptomycin/spectinomycin resistance gene

## Evaluating the Efficiency of gRNAs in CRISPR/Cas9 Mediated Genome Editing in Poplars

T. Bruegmann\*, K. Deecke, M. Fladung\*

Thuenen Institute of Forest Genetics, Grosshansdorf, Germany

tobias.bruegmann@thuenen.de; matthias.fladung@thuenen.de

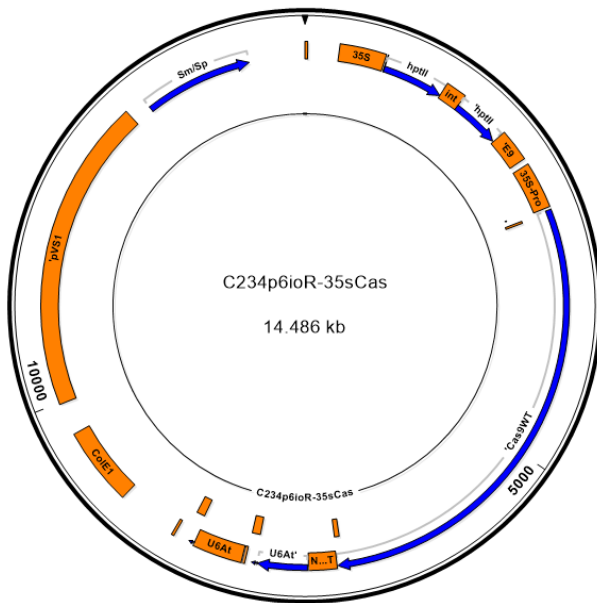

**Fig. 3** C234p6ioR-35sCas plasmid for knockout of both *NFP-like1* and *NFP-like2* genes

35S: cauliflower mosaic virus 35S promoter; hptII: coding sequence of hygromycin resistance gene; Int: StLS1 (*Solanum tuberosum* rbcL-large subunit 1)-intron; 'E9: terminator Rbcs-E9; 35S-Pro: cauliflower mosaic virus 35S promoter region; 'Cas9WT: Cas9 coding sequence of Cas9 wildtype gene (*Streptococcus pyogenes*); N...T: nopaline synthase terminator; U6At': coding U6 promoter (*Arabidopsis thaliana*) followed by gRNA sequence; U6At: U6 terminator (*Arabidopsis thaliana*); ColE1: origin of replication; 'pVS1: origin of replication in *A. tumefaciens*; Sm/Sp: coding sequence of streptomycin/spectinomycin resistance gene

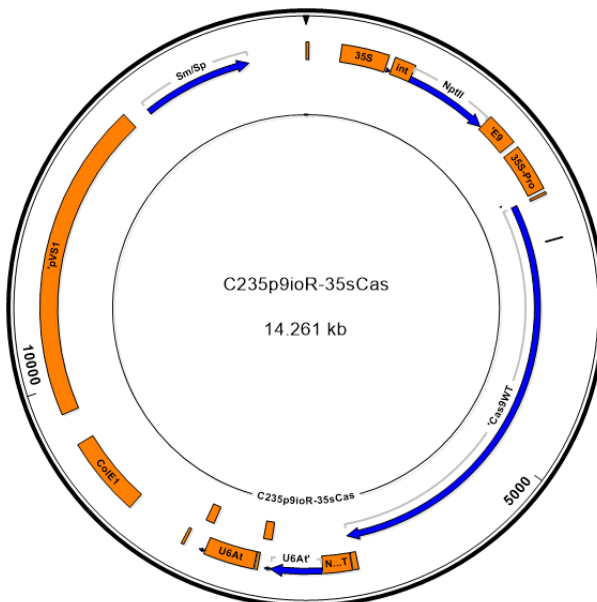

**Fig. 4** C235p9ioR-35sCas plasmid for knockout of both *NFP-like3* and *NFP-like4* genes.

35S: cauliflower mosaic virus 35S promoter; Int: StLS1 (*Solanum tuberosum* rbcL-large subunit 1)-intron; NptII: coding sequence of kanamycin resistance gene; 'E9: terminator Rbcs-E9; 35S-Pro: cauliflower mosaic virus 35S promoter region; 'Cas9WT: Cas9 coding sequence of Cas9 wildtype gene (*Streptococcus pyogenes*); N...T: nopaline synthase terminator; U6at: coding U6 promoter (*Arabidopsis thaliana*) followed by gRNA sequence; ColE1: origin of replication; 'pVS1: origin of replication in *A. tumefaciens*; Sm/Sp: coding sequence of streptomycin/spectinomycin resistance gene



## Evaluating the Efficiency of gRNAs in CRISPR/Cas9 Mediated Genome Editing in Poplars

T. Bruegmann\*, K. Deecke, M. Fladung\*

Thuenen Institute of Forest Genetics, Grosshansdorf, Germany

tobias.bruegmann@thuenen.de; matthias.fladung@thuenen.de

```
GCCAAGCTCA TCACCCAGCG CAAGTTCGAC AACTTGACCA AGGCCGAGCG TGGAGGCCTC AGCGAACTGG ACAAGGCTGG ATTCATCAAG
AGGCAACTTG TTGAAACCCG CCAGATTACC AAGCACGTGG CCCAGATCCT CGACTCCCGT ATGAACACTA AGTACGATGA GAACGACAAG
CTGATCCGCG AGGTCAAAGT GATTACCCTC AAGAGCAAGC TCGTGTCTGA CTTCAGAAAG GACTTCCAAT TCTACAAGGT TAGGGAGATC
AACAAC TACC ACCACGCCCA CGATGCTTAC CTTAATGCCG TGGTCGGCAC CGCCTTGATC AAGAAGTACC CCAAGCTGGA GTCCGAGTTC
GTGTATGGTG ACTACAAGGT CTACGACGTT CGCAAGATGA TCGCTAAGAG CGAGCAGGAG ATTGGCAAGG CCACCGCCAA GTACTTCTTC
TACTCCAACA TCATGAACTT CTTTAAGACC GAGATCACTT TGGCTAACGG GGAGATCCGT AAGCGCCCTC TCATTGAAAC CAACGGAGAA
ACCGGCGAGA TCGTGTGGGA CAAGGGCAGG GACTTCGCCA CCGTCAGAAA AGTGCTGAGC ATGCCCAAG TCAACATCGT GAAGAAAACC
GAGGTTTCTGAG CTGGAGGCTT CTCCAAGGAG TCTATCCTCC CAAAGCGCAA TTCCGATAAG TTGATTGCCG GTAAGAAGGA CTGGGACCCC
AAGAAGTACG GTGGATTCTGA CAGCCCAACC GTCGCCTACT CCGTGCTTGT CGTGGCTAAA GTTGAGAAGG GCAAGAGCAA GAAGCTCAAG
TCCGTCAGAG AGCTGCTCGG GATCACCATC ATGGAGCGCA GCTCCTTCGA GAAGAACCCT ATTGATTTCC TTGAGGCCAA GGGCTACAAG
GAAGTGAAGA AGGACTTGAT CATCAAGCTC CCCAAGTACT CTCTGTTCGA GCTTGAGAAC GGAAGGAAGC GTATGCTCGC CTCCGCTGGC
GAGCTGCAAA AGGGAACAGA GTTGGCCCTC CCAAGCAAGT ACGTCAACTT CCTGTACCTC GCCTCCCACT ATGAGAAGCT CAAGGGCAGC
CCCAGGACA ACGAACAGAA GCAGTTGTTT GTGGAGCAGC ATAAGCACTA CCTTGACGAG ATCATTGAGC AGATCAGCGA GTTCTCCAAG
CGCGTTATCC TGGCTGACGC CAATCTCGAT AAAGTCCCTT CTGCCTACAA CAAGCACAGG GACAAGCCTA TCAGAGAGCA GGCTGAAAAC
ATTATCCACT TGTTACCCCT CACCAACCTG GGTGCCCCAG CCGCCTTCAA GTACTTCGAC ACTACCATCG ACCGCAAGCG TTACACCTCC
ACCAAGGAAG TGCTCGATGC TACCCTTATC CACCAGAGCA TTACTGGGTT GTACGAAACC AGGATCGACC TGTCCCAACT CGGCGGAGAC
AAGCGCCCCG CCGCCACCAA GAAGGCTGGC CAGGCCAAGA AGAAGAAGTA A
```

NLS sequence in green
