# Supplementary material for: Evaluating the Efficiency of gRNAs in CRISPR/Cas9 Mediated Genome Editing in Poplars
Source: MDPI journal article supplement (doi:10.3390/ijms20153623), 2019-07-24
Supplement: s1 [file s1]

## Evaluating the Efficiency of gRNAs in CRISPR/Cas9 Mediated Genome Editing in Poplars

T. Bruegmann\*, K. Deecke, M. Fladung\*

Thuenen Institute of Forest Genetics, Grosshansdorf, Germany

tobias.bruegmann@thuenen.de; matthias.fladung@thuenen.de

## Online Resource 4

### PCR and sequencing primers

PCR and sequencing primers for proof of mutation in gRNA targeting genomic sites of the candidate genes used in this study. T<sub>A</sub>: annealing temperature; F: forward sequence; R: reverse sequence

| Target | Amplification Primer                                                                                                                                               | T <sub>A</sub>     | Sequencing Primer                                                                                                                                                                                                                                                                                                                                                                 |
|--------|--------------------------------------------------------------------------------------------------------------------------------------------------------------------|--------------------|-----------------------------------------------------------------------------------------------------------------------------------------------------------------------------------------------------------------------------------------------------------------------------------------------------------------------------------------------------------------------------------|
| 1      | F: 5'-AGA CTC AGT TAT TCA AGG AGC-3'<br>R: 5'-TAT GAG GAC ACT ATA TCG TTG-3'                                                                                       | 53 °C              | R: 5'-TAT GAG GAC ACT ATA TCG TTG-3'                                                                                                                                                                                                                                                                                                                                              |
| 2      | F: 5'-GTG AAT CCA GTG TAT GAT CCT G-3'<br>R: 5'-TGG TTA TGG GAT AGG CGT G-3'                                                                                       | 55 °C              | F: 5'-GGC CAT ACC AAA GGC TTC AAT G-3'                                                                                                                                                                                                                                                                                                                                            |
| 3      | F: 5'-GGC CAT ACC AAA GTC TTC ACT G-3'<br>R: 5'-CTC TCC TAA GAG CTT CCT GC-3'                                                                                      | 57 °C              | F: 5'-GGC CAT ACC AAA GTC TTC ACT G-3'                                                                                                                                                                                                                                                                                                                                            |
| 4      | F: 5'-GAA GCA TCG TCT TGT TGT GC-3'<br>R: 5'-CTG CAG CTC AGA AAT CGA CTG-3'                                                                                        | 57 °C              | F: 5'-CTC CGA ACT TGA TTG CCT GC-3'<br>R: 5'-CTG CAG CTC AGA AAT CGA CTG-3'                                                                                                                                                                                                                                                                                                       |
| 5      | F: 5'-TAG AGA ATT CGT ACA TCA GCT-3'<br>R: 5'-CTG TAG GAG TAT TTA GTA TGC-3'                                                                                       | 52 °C              | F: 5'-GGT ACT GAC TTG ATT GCC TGC-3'                                                                                                                                                                                                                                                                                                                                              |
| 6      | F: 5'-TTT CCA CAC AGG CTC TTC TTC TC-3'<br>R: 5'-CTG TTT CCA TCC CAG ATG TCC-3'<br><br>F: 5'-GTC CAC CCA TGTC TCC TTA-3'<br>R: 5'-TAG TGG TTT TCA ATC ACA ATG T-3' | 60 °C<br><br>58 °C | For the editing region of gRNA5:<br>F, T1: 5'-TTT CCA CAC AGG CTC TTC TTC TC-3'<br>F, T2: 5'-AAA ATC AAT GGC CGG GTC TTG G-3'<br>For the editing region of gRNA6:<br>R, T1: 5'-GTA TTT GAA GGC CAC TTA CAG AAC-3'<br>R, T2: 5'-CTG TTT CCA TCC CAG ATG TCC-3'<br>For the editing region of gRNA5:<br>F: 5'-GTC CAC CCA TGT CTC CTT A-3'<br>R: 5'-TAG TGG TTT TCA ATC ACA ATG T-3' |
| 7      | F: 5'-ACA AAA CAT TGC AAG GCA GAA AAG-3'<br>R: 5'-CCC ACT TAC CAA GAC CAG TAA AA-3'                                                                                | 61.1 °C            | F: 5'-ACA GTA ATA TCC TCC ACC ATT-3'<br>R: 5'-AGT GTT GCC TGC CTC GAT GGT-3'                                                                                                                                                                                                                                                                                                      |
| 8      | F: 5'-AGA AAG GCA GAA CAA CCA AG-3'<br>R: 5'-TAT GTT ATT GCC ATT AGC ATC CAC-3'                                                                                    | 52.2 °C            | F: 5'-CTA TTA CAG TAC TAT CCT CCA-3'<br>R: 5'-AAG TAT TCA GTT GAG ACA AGG-3'                                                                                                                                                                                                                                                                                                      |
| 9      | F: 5'-ACT TGT CCA CTT TCA AAT GC -3'<br>R: 5'-CAC GTT CAC CAA CTG TGA TAA AAT-3'                                                                                   | 58 °C              | F: 5'-ACT TGT CCA CTT TCA AAT GC-3'<br>R: 5'-CAC GTT CAC CAA CTG TGA TAA AAT-3'                                                                                                                                                                                                                                                                                                   |
